# Supplementary material for: Flexible MA2Z4 (M = Mo, W; A = Si, Ge and Z = N, P, As) monolayers with outstanding mechanical, dynamical, electronic, and piezoelectric properties and anomalous dynamic polarization
Source: Royal Society of Chemistry journal article supplement (doi:10.1039/d3cp01452e), 2023-01-01
Supplement: d3cp01452e1.pdf [file d3cp01452e1.pdf]

# Flexible MA<sub>2</sub>Z<sub>4</sub> (M= Mo, W; A= Si, Ge and Z=N, P, As) monolayers with outstanding mechanical, dynamical, piezoelectric properties and anomalous dynamic polarization

Xinxin Wang<sup>1,\*</sup>, Xiaohong Li<sup>1</sup>, Weiwei Ju<sup>1</sup>, Dandan Wang<sup>1</sup>, Jianguo Wan<sup>2</sup>

<sup>1</sup>School of Physics and Engineering, and Henan Key Laboratory of Photoelectric Energy Storage Materials  
and Applications, Henan University of Science and Technology, Luoyang 471023, China.

<sup>2</sup>National Laboratory of Solid State Microstructures, Nanjing University, Nanjing 210093, China.

---

\* Author to whom correspondence should be addressed: xxwang@haust.edu.cn

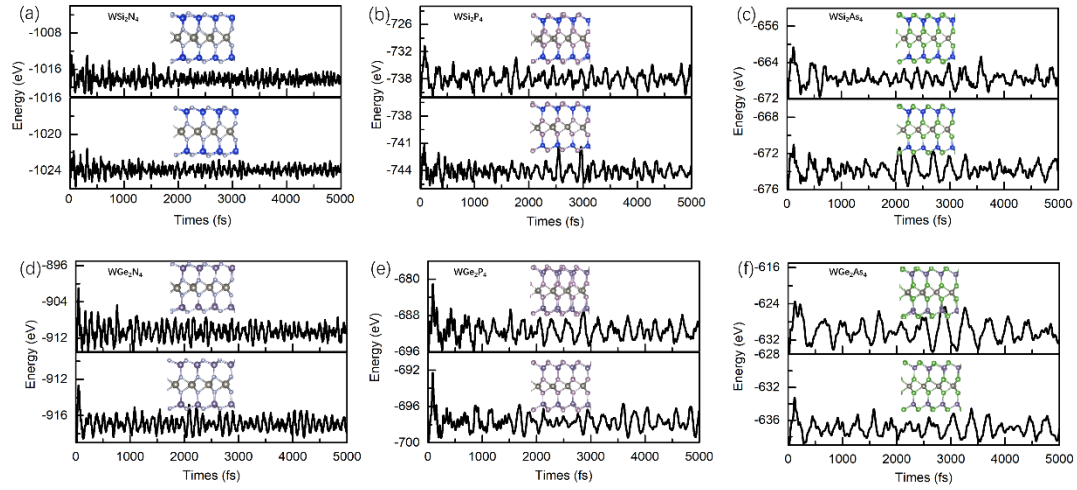

**Fig.S1 (a) – (f) The evolution of the total energies and snapshot structures of  $WA_2Z_4$  monolayers. The down and up variation in each picture represents simulations at 300 K and 700 K, respectively.**

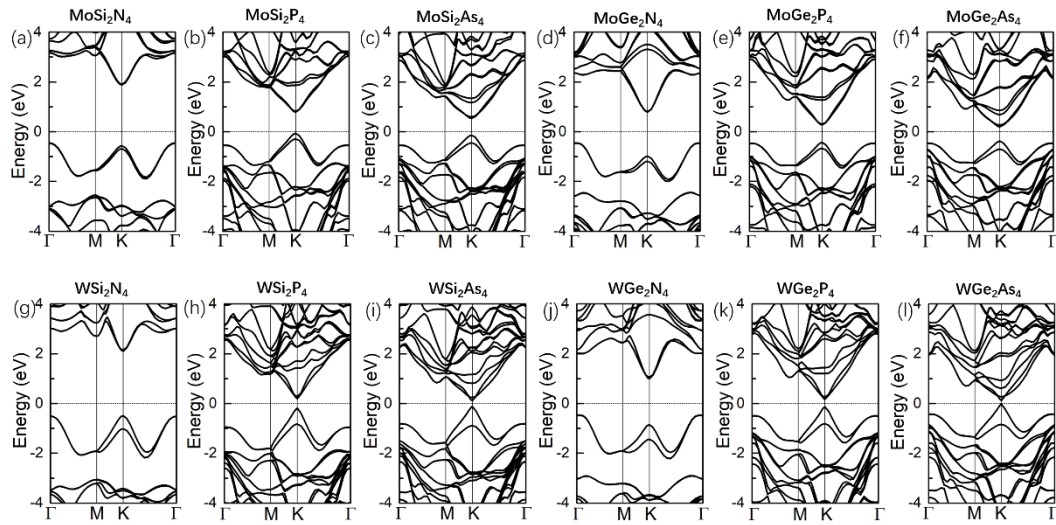

**Fig. S2 (a)-(l) The band structures of  $MA_2Z_4$  monolayers with HSE-SOC calculation**

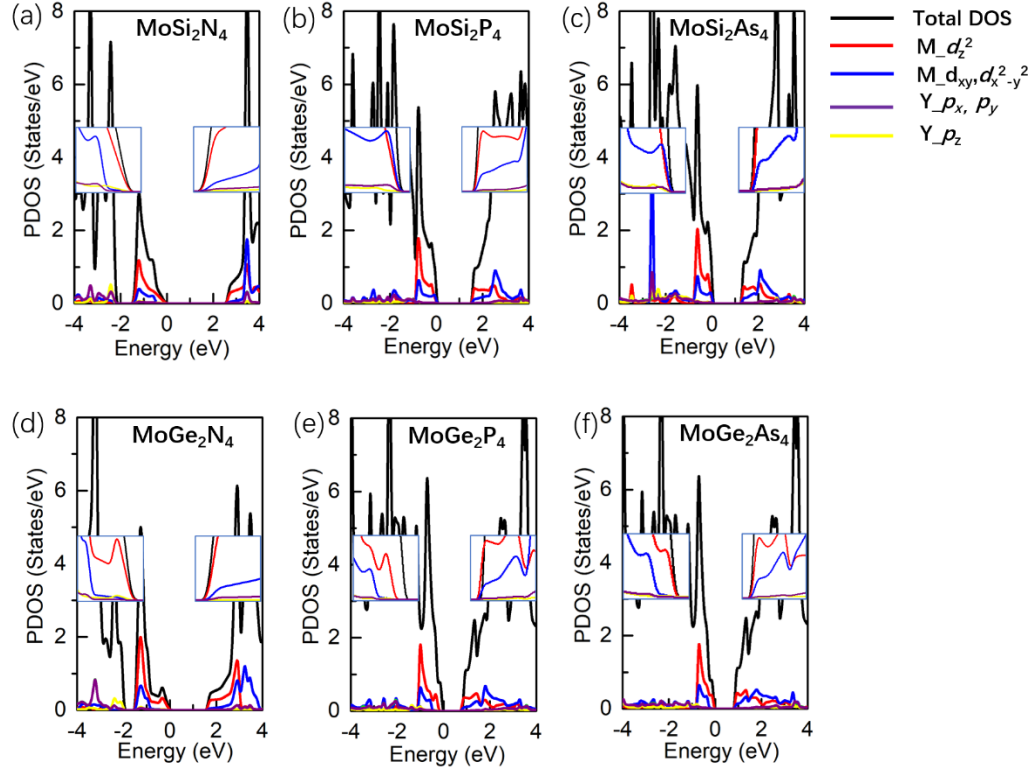

**Fig. S3 (a) –(f) The projected density of states of  $\text{MoA}_2\text{Z}_4$  monolayers with HSE calculation**
